# Supplementary figures and images for: Metabolic Alterations Induced by Sucrose Intake and Alzheimer’s Disease Promote Similar Brain Mitochondrial Abnormalities
Source: PubMed Central journal article supplement — Diabetes. 2012 Apr 13;61(5):1234–42. doi: 10.2337/db11-1186 (PMC3331754; doi:10.2337/db11-1186), 2012-04-13

SUPPLEMENTARY DATA

Supplementary Figure 1.

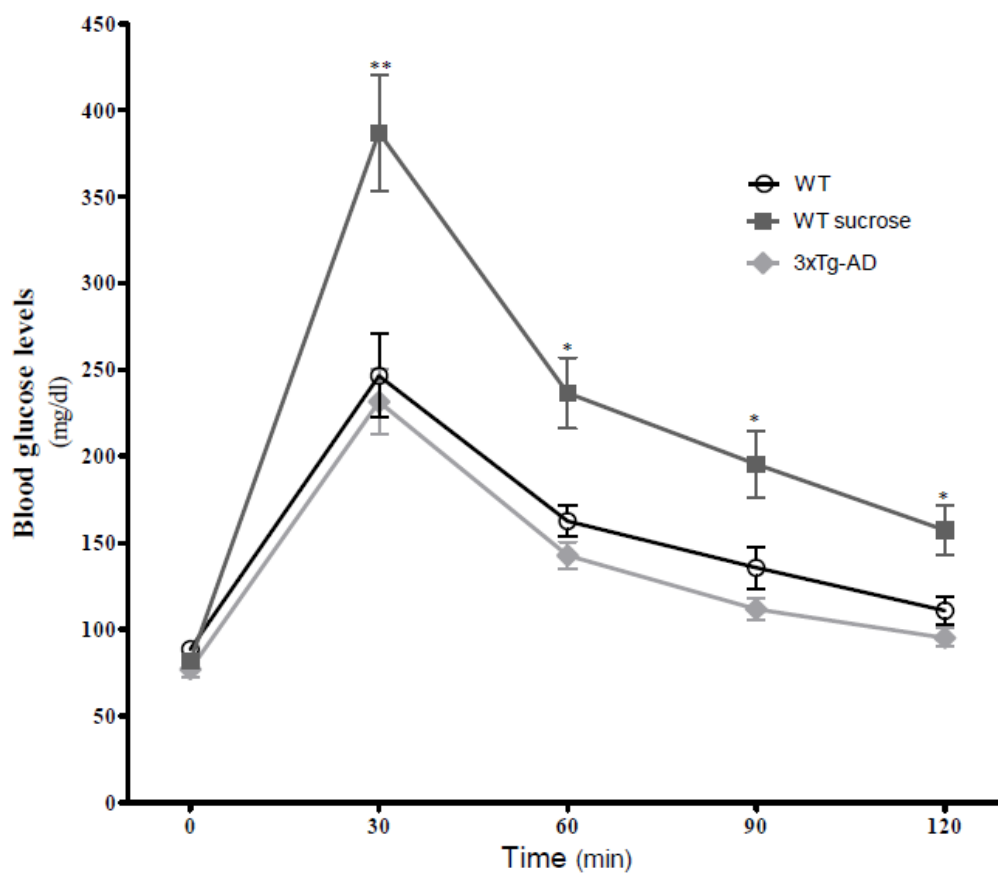

Supplement: supp_db11-1186_DB111186SupplementaryData.pdf [file supp_db11-1186_DB111186SupplementaryData.pdf]
